# Supplementary material for: Development of a VEGF-activated scaffold with enhanced angiogenic and neurogenic properties for chronic wound healing applications
Source: Royal Society of Chemistry journal article supplement (doi:10.1039/d4bm01051e), 2025-01-01

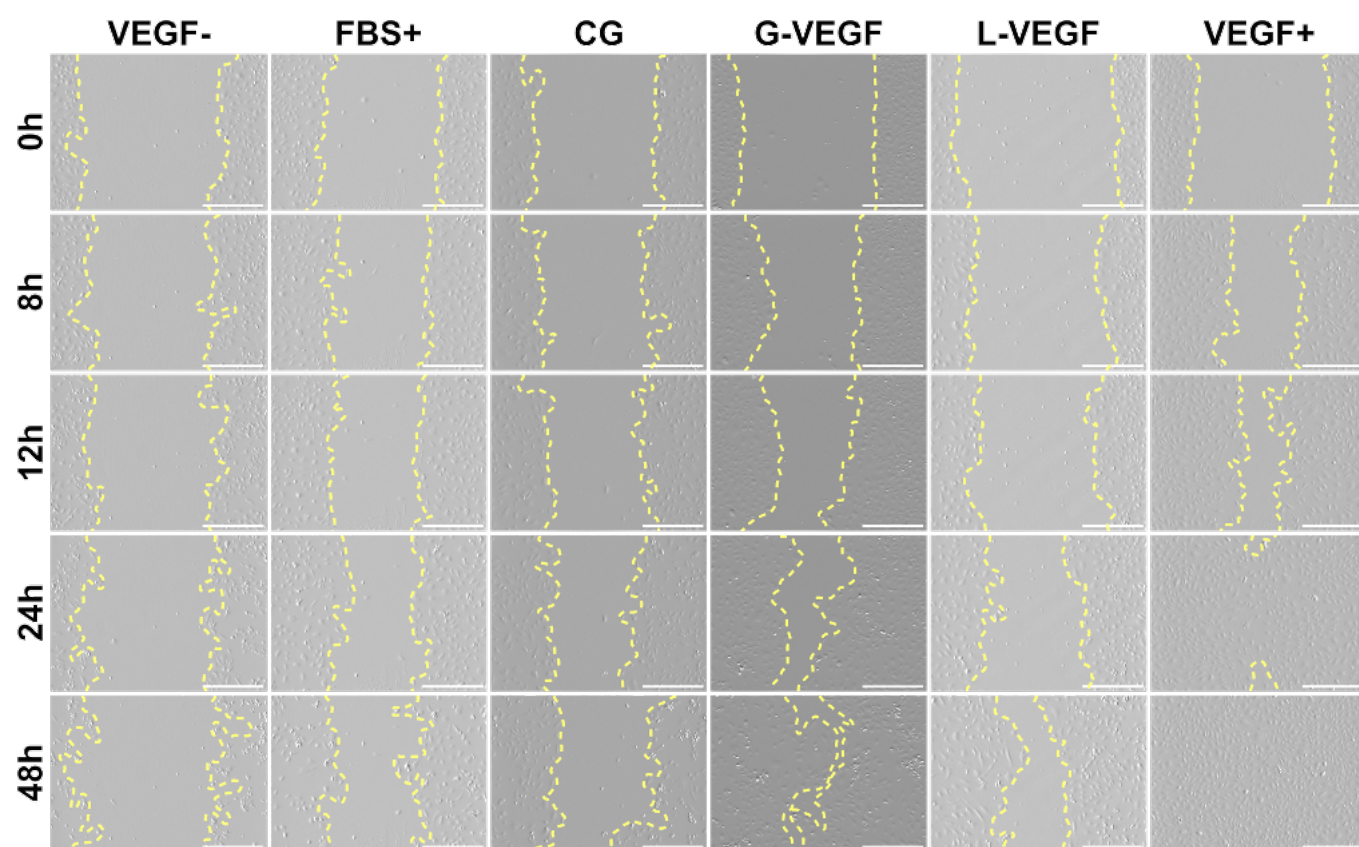

Supplement: d4bm01051e6.pdf [file d4bm01051e6.pdf]
